# Supplementary material
Source: PubMed Central journal article supplement (PMC2763384)
Supplement: NIHMS110541-supplement-supp_fig1.pdf [file NIHMS110541-supplement-supp_fig1.pdf]

hsa-mir-877: human, cow, dog, elephant, mouse, rat, rhesus, tenrec

```

>Human chr6 30660087-30660172
GTAGAGGATGCGCAGGGGACACCGGCAAAAGACTTGGGGTTCCCTGGGACCCTCAGACGTTGTTCCCTCCCTCCAG
-35.80 ...(((((((.....((((((((((((((((((((((((((((((((((((((((((((((((((((((((
Rhesus chr4 30166021-30166106
GTAGAGGATGCGCAGGGGACACCGGCTAAGACTCCGGGGTTCCCTGGGACCCTCAGACATGTTGTTCCCTCCCTCCAG
-36.41 ...(((((((.....((((((((((((((((((((((((((((((((((((((((((((((((((((((((
Rat chr20 2958183-2958267
GTAGAGGATGCGCAGGGGACACCAAGTTAGCCCTTCCGGGTTGTGGCCCTTGACATGTTGTTCCCTCCCTCCAG
-35.00 ...(((((((.....((((((((((((((((((((((((((((((((((((((((((((((((((((((((
Mouse chr17 59608553-59608637
GTAGAGGATGCGCAGGGGACACAAGTTAGCCCTTCCGGGTTGTGGACCCTTGACATGTTGTTCCCTCCCTCCAG
-35.60 ...(((((((.....((((((((((((((((((((((((((((((((((((((((((((((((((((((((
Dog chr12 3408300-3408384
GTAGAGGATGCGCAGGGGACATGGGCTGAGACTTGGGAGTTCCTAGAACCTCTAGACATGTTGTTCCCTCCCTCCAG
-32.50 ...(((((((.....((((((((((((((((((((((((((((((((((((((((((((((((((((((((
Cow chr23 26513259-26513343
GTAGAGGATGCGCAGGGGACACCGGCTAAGACTGGGGCTCCCGGACCCCCCAACATGTTGTTCCCTCCCTCCAG
-38.30 ...(((((((.....((((((((((((((((((((((((((((((((((((((((((((((((((((((((
Elephant scaffold_82320 103-188
GTAGAGGATGCGCAGGGGACACAGGCTATGACATGGGGCTCCCTGGGGCCCTTGAAACATGTTGTTCCCTCCCTCCAG
-35.70 ...(((((((.....((((((((((((((((((((((((((((((((((((((((((((((((((((((((
Tenrec scaffold_315780 12230-12314
GTAGAGGATGCGCAGGGGACACCGGGGAGACTGGGCTGGGCTGCTCCCAACATGTTGTTCCCTCCCTCCAG
-36.20 ...(((((((.....((((((((((((((((((((((((((((((((((((((((((((((((((((((((

```

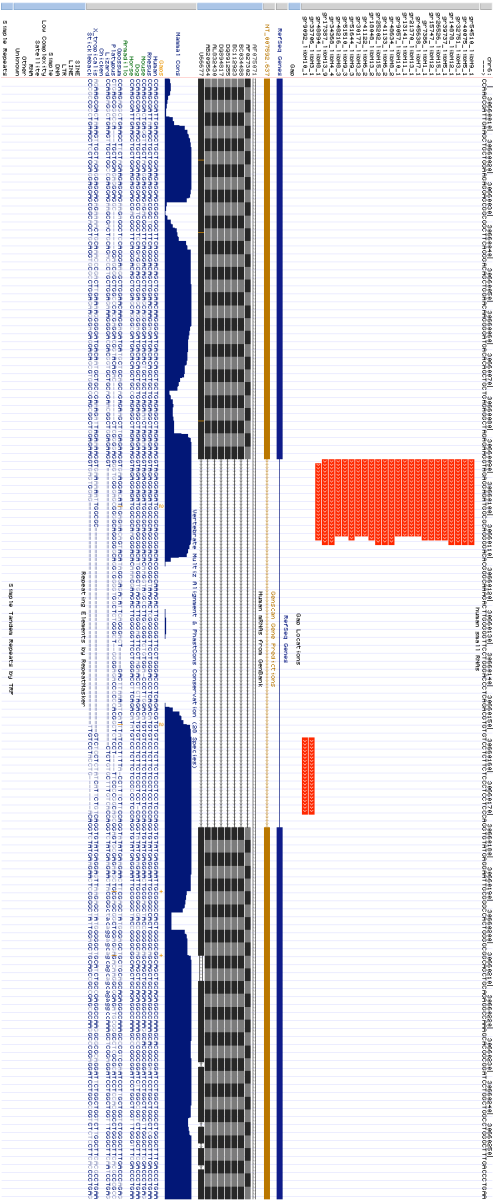





NM\_025160.1: human, chimp, cow, dog, hedgehog, opossum, rhesus, shrew

```

>Human      chr1      222685906-222686005
GTAAGGTAGGGCATATAGAGCTGTGTGACGTGCTAAATAATTAACAGATTTGGAGTGTGACATTTTGTTCCTTTATACCAATTTTTCACG
-17.10      (((((((((((((((((((((((((((((((((((((((((((((((((((((((((((((((((((((((((((((((((((((((((((
chimp      chr1      20504905-205050004
GTAAGGTAGGGCATATAGAGCTGTGTGACGTGCTAAATAATTAACAGATTTGGAGTGTGACATTTTGTTCCTTTATACCAATTTTTCACG
-17.10      (((((((((((((((((((((((((((((((((((((((((((((((((((((((((((((((((((((((((((((((((((((((((((
rhesus     chr1      82202846-82202945
GTAAGGTAGGGCATATAGAGCTGTGTGACGTGCTAAATAATTAACAGATTTGGAGTGTGACATTTTGTTCCTTTATACCAATTTTTCACG
-16.20      (((((((((((((((((((((((((((((((((((((((((((((((((((((((((((((((((((((((((((((((((((((((((((
shrew      scaffold_236018 46395-46494
GTAAGGTAGGGCATATAGAGCTGTGTGACGTGCTAAATAATTAACAGATTTGGAGTGTGACATTTTGTTCCTTTATACCAATTTTTCACG
-14.80      (((((((((((((((((((((((((((((((((((((((((((((((((((((((((((((((((((((((((((((((((((((((((((
hedgehog  scaffold_31531 7725-7827
GTAAGGTAGGGCATATAGAGCTGTGTGACGTGCTAAATAATTAACAGATTTGGAGTGTGACATTTTGTTCCTTTATACCAATTTTTCACG
-25.10      (((((((((((((((((((((((((((((((((((((((((((((((((((((((((((((((((((((((((((((((((((((((((((
dog        chr7      41061071-41061170
GTAAGGTAGGGCATATAGAGCTGTGTGACGTGCTAAATAATTAACAGATTTGGAGTGTGACATTTTGTTCCTTTATACCAATTTTTCACG
-27.10      (((((((((((((((((((((((((((((((((((((((((((((((((((((((((((((((((((((((((((((((((((((((((((
cow        chr16     24511052-24511151
GTAAGGTAGGGCATATAGAGCTGTGTGACGTGCTAAATAATTAACAGATTTGGAGTGTGACATTTTGTTCCTTTATACCAATTTTTCACG
-15.90      (((((((((((((((((((((((((((((((((((((((((((((((((((((((((((((((((((((((((((((((((((((((((((
>Opossum   chr2      135883898-135884001
GTAAGGTAGGGCATATAGAGCTGTGTGACGTGCTAAATAATTAACAGATTTGGAGTGTGACATTTTGTTCCTTTATACCAATTTTTCACG
-16.72      (((((((((((((((((((((((((((((((((((((((((((((((((((((((((((((((((((((((((((((((((((((((((((

```

Genome browser interface showing a genomic track for NM\_025160.1. The track includes various annotations such as RefSeq, Ensembl, and RepeatMasker. A large blue block indicates a region of high conservation or a specific feature. The bottom section shows a detailed alignment of the sequence with various species, including human, chimp, cow, dog, hedgehog, opossum, rhesus, and shrew. The alignment is presented as a grid of characters (A, C, G, T) with gaps represented by dashes. The track also displays coordinates and other genomic data.





```

NM_198446.0: human, chimp, cow, hedgehog, mouse, rat
>Human chr1 38046698-38046788
GTGAGAGGGGGCCGTCGGGGCGGAGAGAGGGGCTTTGGCCCCCGCAAGCCGCTGACCCGTCCTCCCGGGCAG
-45.90 .((( (((((((((((((((((((((((((((((((((((((((((((((((((((((((((((((((((((
>Chimp chr1 38385021-38385111
GTGAGAGGGGGCCGTCGGGGCGGAGAGGGGCTTTGGCCCCCGCAAGCCGCTGACCCGTCCTCCCGGGCAG
-45.50 .((( (((((((((((((((((((((((((((((((((((((((((((((((((((((((((((((((((((
>Rat chr1 28912879-28912965
GTGAGAGGGGGCCGTCGGGGCGGAGAGGGGCTTTGGCCCCCGCAAGCCGCTGACCCGTCCTCCCGGGCAG
-47.70 .((( (((((((((((((((((((((((((((((((((((((((((((((((((((((((((((((((((((
>Mouse chr1 30676876-30676963
GTGAGAGGGGGCCGTCGGGGCGGAGAGGGGCTTTGGCCCCCGCAAGCCGCTGACCCGTCCTCCCGGGCAG
-43.50 .((( (((((((((((((((((((((((((((((((((((((((((((((((((((((((((((((((((((
>Hedgehog scaffold_273501 14459-14549
gtgagagggggccgctcggggcgaggaggggctcgaactccggcgagggccgctgaccgctctcccccggcgag
-43.80 .((( (((((((((((((((((((((((((((((((((((((((((((((((((((((((((((((((((((
>Cow chr3 11512244-11512333
GTGAGAGGGGGCCGTCGGGGCGGAGAGGGGCTTTGACCCGCGCAAGCCGCTGACCCGTCCTCCCGGGCAG
-44.21 .((( (((((((((((((((((((((((((((((((((((((((((((((((((((((((((((((((((((

```

Intron has coding potential, but has evidence of multiple spliced ESTs

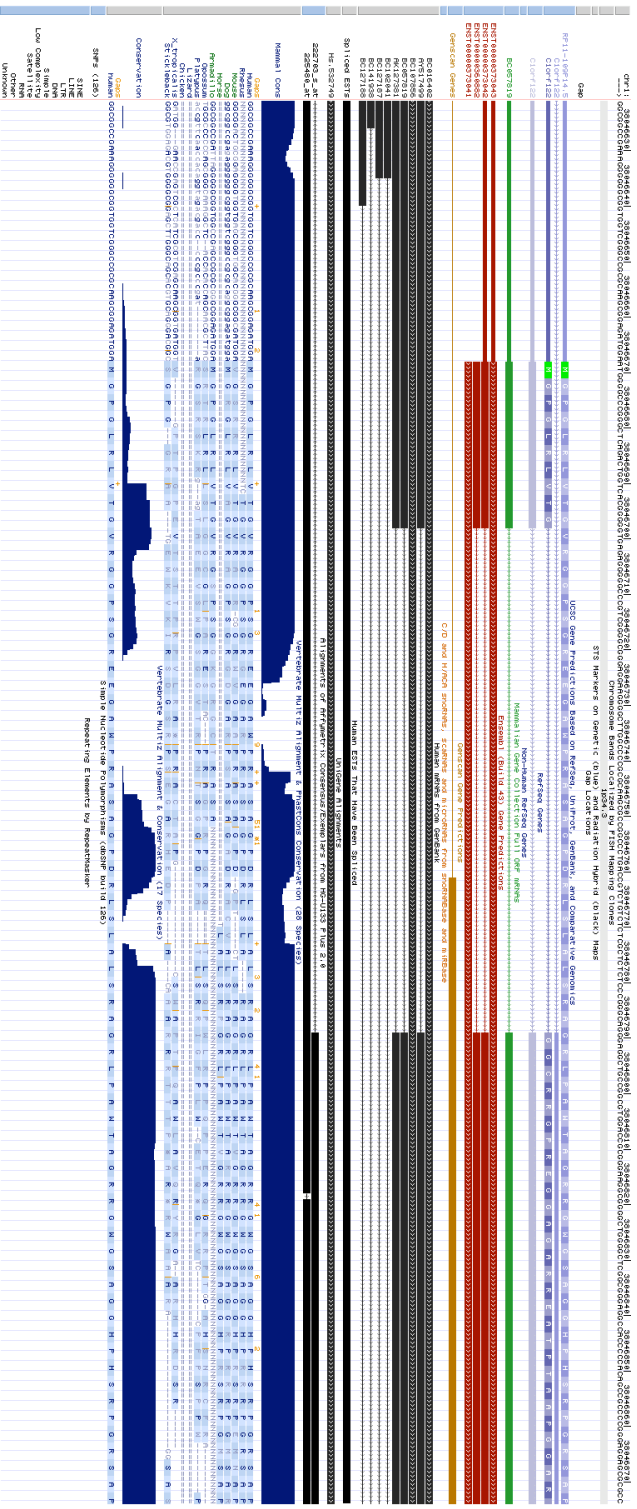









NM\_002912\_7 Chimp Rhesus Rabbit Dog Horse

```
>Chimp      chr6      113298181-113298267
GTAAGTGGTAAATTAATTAATGATTCACAGACTAAATTTAAATTCCTTTGTTATCTGTTAATAAGGATACTTTAATTAAGCAG
-9.71      .....(((.....(((.....(((.....(((.....(((.....))).....))).....))).....))).....)))..... [ ]
>Rhesus    chr4      15103584-15103670
GTAAGTGGTAAATTAATTAATGATTCACAGACTAAATTTAAATTCCTTTGTTATCTGTTAATAAGGATACTTTAATTAAGCAG
-9.71      .....(((.....(((.....(((.....(((.....(((.....))).....))).....))).....))).....)))..... [ ]
>Rabbit    scaffold 2(73828-73912)
GTAAGTGGTAAATTAATTAATGATTCACAGAAAAAATTTAATTCGATTTGTTAATAAGGATACTTTAATTAAGCAG
-10.00     (((.....(((.....(((.....(((.....(((.....))).....))).....))).....))).....)))..... [ ]
>Dog       chr12     70913400-70913484
GTAAGTGGTAAATTAATTAATGATTCACAGACTAAATTTAATTCCTTTGTTATCTGTTAATAAGGATACTTTAATTAAGCAG
-13.50     .....(((.....(((.....(((.....(((.....(((.....))).....))).....))).....))).....)))..... [ ]
>Horse     chr10     55495795-55495881
GTAAGTGGTAAATTAATTAATGATTCACAGACTAAATTTAATTCCTTTGTTATCTGTTAATAAGGATACTTTAATTAAGCAG
-10.40     .....(((.....(((.....(((.....(((.....(((.....))).....))).....))).....))).....)))..... [ ]
```

Gene models and conservation tracks for the region 113298181-113298267 on chromosome 6 of the Chimp genome.

**Gene Models:**

- USC Gene Predictions:** Based on RefSeq, UniProt, GenBank, and Comparative Genomics. Includes *USC1* (NM\_001001001.1) and *USC2* (NM\_001001002.1).
- RefSeq Genes:** *USC1* (NM\_001001001.1) and *USC2* (NM\_001001002.1).
- Non-RefSeq Genes:** *USC1* (NM\_001001001.1) and *USC2* (NM\_001001002.1).
- Ensembl (Build 43) Gene Predictions:** *USC1* (ENSGM00000000000.1) and *USC2* (ENSGM00000000000.1).
- Genes and Regions from Ensembl and RefSeq:** *USC1* (NM\_001001001.1) and *USC2* (NM\_001001002.1).
- UniProt Alignments:** *USC1* (P00000) and *USC2* (P00000).
- NCBI Conserved Domains:** *USC1* (PF00000) and *USC2* (PF00000).
- Vertebrate Multiple Alignment:** Conservation scores for Chimp, Rhesus, Rabbit, and Dog.

**Conservation:** Conservation scores for Chimp, Rhesus, Rabbit, and Dog. The scores are shown as a bar chart and a line plot.

**Repeat Elements:** Repeating elements by RepeatMasker. The elements are shown as black bars on the sequence.

**Sequence:** The DNA sequence is shown in the bottom track, with the reference sequence (Chimp) in uppercase and the other species in lowercase.





Figure S3. Small RNA Libraries Used For Mirtron Discovery.

| library       | mapped reads | Description                                               | reference |
|---------------|--------------|-----------------------------------------------------------|-----------|
| mouse_lib1    | 23703        | brain                                                     | 1         |
| human_lib1    | 5476         | brain                                                     | 1         |
| human_lib2    | 3202         | skin                                                      | 1         |
| human_lib3    | 2177         | heart                                                     | 1         |
| human_lib4    | 3265         | lung                                                      | 1         |
| human_lib7    | 11939        | umbilical cord blood-derived endothelial progenitor cells | 1         |
| human_lib8    | 3490         | foreskin-derived microvascular endothelial cells          | 1         |
| chimp_libPT0  | 153316       | mix of brain regions                                      | 2         |
| human_libH0   | 118275       | fetal brain                                               | 2         |
| human_libH1   | 24167        | amygdale                                                  | 3         |
| human_libH2   | 18613        | cerebellum                                                | 3         |
| human_libH3   | 44954        | cingulate gyrus                                           | 3         |
| human_libH4   | 48351        | superior frontal gyrus                                    | 3         |
| human_libH5   | 22352        | superior occipital gyrus                                  | 3         |
| human_libH6   | 33855        | medial temporalis gyrus                                   | 3         |
| human_libH7   | 44521        | Hippocampus                                               | 3         |
| human_libH8   | 35007        | hypothalamus                                              | 3         |
| human_libH9   | 44337        | locus coeruleus                                           | 3         |
| human_libH10  | 21306        | superior parietal gyrus                                   | 3         |
| human_libH11  | 38095        | substantia nigra                                          | 3         |
| human_libH12  | 35052        | spinal-cord                                               | 3         |
| human_libH13  | 43885        | thalamus (pulvinar)                                       | 3         |
| human_libH14  | 21648        | caudate nucleus                                           | 3         |
| human_libH15  | 39199        | putamen                                                   | 3         |
| macaque_lib1  | 25856        | superior frontal gyrus                                    | 3         |
| macaque_lib2  | 37528        | medial temporalis gyrus                                   | 3         |
| macaque_lib3  | 37922        | superior occipital gyrus                                  | 3         |
| macaque_lib4  | 44343        | superior parietal gyrus                                   | 3         |
| macaque_lib5  | 28875        | hippocampus                                               | 3         |
| macaque_lib6  | 39652        | cerebellum                                                | 3         |
| macaque_lib7  | 30530        | cingulate gyrus                                           | 3         |
| macaque_lib8  | 38037        | substantia nigra                                          | 3         |
| macaque_lib9  | 34601        | caudate nucleus                                           | 3         |
| macaque_lib10 | 27400        | putamen                                                   | 3         |
| macaque_lib11 | 23220        | locus coeruleus                                           | 3         |
| macaque_lib12 | 41084        | amygdale                                                  | 3         |
| macaque_lib13 | 26796        | thalamus (pulvinar)                                       | 3         |
| macaque_lib14 | 24731        | spinal-cord                                               | 3         |
| macaque_lib15 | 33140        | hypothalamus                                              | 3         |
|               | 1,333,900    |                                                           |           |

1. Berezikov et al. Genome Research 16, 1289-1298.
2. Berezikov et al. Nat Genet 38, 1375-1377.
3. Berezikov et al. Manuscript in preparation.



Figure S4. List of Officially Recognized Mammalian Mirtrons and the Extent of Their Cloning Evidence.

```

classI: miR/miR*cloned from multiple mammals and conserved across mammals

# mir-877
# arms: 2
# species: 4
# libraries: 32
# reads: 148
hsa ...(((((((.(.(.(.((((((((((.(.....((((((((((.....)))))))))).))))))))))....
hsa AGAAGGTAGAGGAGATGGCGCAGGGGACACGGGCAAGACTTGGGGTCTCTGGGACCTCAGACGTGTCTCTCTCCCTCCCTCCAGGTGTA
hsa >>>>+++++
hsa ....GTAGAGGAGATGGCGCAGGGAC..... 1 human_libH0
hsa ....GTAGAGGAGATGGCGCAGG..... 1 human_libH1
hsa ....GTAGAGGAGATGGCGCAGGG..... 1 human_libH1
hsa ....GTAGAGGAGATGGCGCAGGG..... 1 human_libH10
hsa ....GTAGAGGAGATGGCGCAGGG..... 1 human_libH10
hsa ....GTAGAGGAGATGGCGCAGGG..... 1 human_libH12
hsa ....GTAGAGGAGATGGCGCAGGG..... 1 human_libH12
hsa ....GTAGAGGAGATGGCGCAGGG..... 1 human_lib4
hsa ....GTAGAGGAGATGGCGCAGGGAC..... 8 human_libH13
hsa ....GTAGAGGAGATGGCGCAGGG..... 2 human_libH13
hsa ....GTAGAGGAGATGGCGCAGGG..... 1 human_libH13
hsa ....GTAGAGGAGATGGCGCAGG..... 1 human_libH13
hsa ....GTAGAGGAGATGGCGCAGGG..... 1 human_libH15
hsa ....GTAGAGGAGATGGCGCAGGG..... 1 human_libH15
hsa ....GTAGAGGAGATGGCGCAGGG..... 1 human_libH7
hsa ....GTAGAGGAGATGGCGCAGGG..... 1 human_libH15
hsa ....GTAGAGGAGATGGCGCAGG..... 2 human_libH3
hsa ....GTAGAGGAGATGGCGCAGGG..... 1 human_libH3
hsa ....GTAGAGGAGATGGCGCAGGG..... 1 human_libH3
hsa ....GTAGAGGAGATGGCGCAGGG..... 2 human_libH4
hsa ....GTAGAGGAGATGGCGCAGGG..... 2 human_libH4
hsa ....GTAGAGGAGATGGCGCAGGGAC..... 1 human_libH4
hsa ....GTAGAGGAGATGGCGCAGGGAC..... 1 human_libH4
hsa ....GTAGAGGAGATGGCGCAGGG..... 1 human_libH8
hsa ....GTAGAGGAGATGGCGCAGGG..... 1 human_libH5
hsa ....GTAGAGGAGATGGCGCAGGG..... 2 human_libH6
hsa ....GTAGAGGAGATGGCGCAGGG..... 1 human_libH6
hsa ....GTAGAGGAGATGGCGCAGGG..... 1 human_libH7
hsa ....GTAGAGGAGATGGCGCAGG..... 2 human_libH8
hsa ....GTAGAGGAGATGGCGCAGGG..... 2 human_libH8
hsa ....GTAGAGGAGATGGCGCAGGG..... 1 human_libH8
hsa ....GTAGAGGAGATGGCGCAGGG..... 3 human_libH0
hsa ....GTAGAGGAGATGGCGCAGG..... 3 human_libH9
hsa ....GTAGAGGAGATGGCGCAGGG..... 2 human_libH9
hsa ....GTAGAGGAGATGGCGCAGGG..... 1 human_libH9
ptr ...(((((((.(.(.(.((((((((((.(.....((((((((((.....)))))))))).))))))))))....
ptr AGAAGGTAGAGGAGATGGCGCAGGGACACGGGCAAGACTTGGGGTCTCTGGGACCTCAGACGTGTCTCTCTCCCTCCCTCCAGGTGTA
ptr >>>>+++++
ptr ....GTAGAGGAGATGGCGCAGG..... 1 chimp_libPT0
ptr ....GTAGAGGAGATGGCGCAGGG..... 1 chimp_libPT0
mm1 ...(((((((.(.(.(.((((((((((.(.....((((((((((.....)))))))))).))))))))))....
mm1 AGAAGGTAGAGGAGATGGCGCAGGGACACGGGCAAGACTTGGGGTCTCTGGGACCTCAGACGTGTCTCTCTCCCTCCCTCCAGGTGTA
mm1 >>>>+++++
mm1 ....GTAGAGGAGATGGCGCAGGG..... 1 macaque_lib10
mm1 ....GTAGAGGAGATGGCGCAGGG..... 1 macaque_lib10
mm1 ....GTAGAGGAGATGGCGCAGGG..... 3 macaque_lib11
mm1 ....GTAGAGGAGATGGCGCAGGG..... 2 macaque_lib1
mm1 ....GTAGAGGAGATGGCGCAGGG..... 1 macaque_lib11
mm1 ....GTAGAGGAGATGGCGCAGGGAC..... 1 macaque_lib11
mm1 ....GTAGAGGAGATGGCGCAGG..... 1 macaque_lib11
mm1 ....GTAGAGGAGATGGCGCAGGGAC..... 4 macaque_lib12
mm1 ....GTAGAGGAGATGGCGCAGGGAC..... 1 macaque_lib12
mm1 ....GTAGAGGAGATGGCGCAGGGAC..... 1 macaque_lib12
mm1 ....GTAGAGGAGATGGCGCAGGG..... 1 macaque_lib12
mm1 ....GTAGAGGAGATGGCGCAGG..... 1 macaque_lib1
mm1 ....GTAGAGGAGATGGCGCAGGG..... 1 macaque_lib13
mm1 ....GTAGAGGAGATGGCGCAGG..... 1 macaque_lib13
mm1 ....GTAGAGGAGATGGCGCAG..... 1 macaque_lib13
mm1 ....GTAGAGGAGATGGCGCAGGG..... 1 macaque_lib14
mm1 ....GTAGAGGAGATGGCGCAGGGAC..... 1 macaque_lib14
mm1 ....GTAGAGGAGATGGCGCAGGG..... 1 macaque_lib15
mm1 ....GTAGAGGAGATGGCGCAGGGAC..... 1 macaque_lib15
mm1 ....GTAGAGGAGATGGCGCAGGGAC..... 6 macaque_lib3
mm1 ....GTAGAGGAGATGGCGCAGGG..... 2 macaque_lib3
mm1 ....GTAGAGGAGATGGCGCAGG..... 2 macaque_lib3
mm1 ....GTAGAGGAGATGGCGCAGGGAC..... 1 macaque_lib3
mm1 ....GTAGAGGAGATGGCGCAGGG..... 9 macaque_lib4
mm1 ....GTAGAGGAGATGGCGCAGG..... 2 macaque_lib4
mm1 ....GTAGAGGAGATGGCGCAGGG..... 2 macaque_lib4
mm1 ....GTAGAGGAGATGGCGCAGGGAC..... 1 macaque_lib4
mm1 ....GTAGAGGAGATGGCGCAGGGAC..... 1 macaque_lib4
mm1 ....GTAGAGGAGATGGCGCAGGGAC..... 1 macaque_lib4
mm1 ....GTAGAGGAGATGGCGCAGGG..... 5 macaque_lib5
mm1 ....GTAGAGGAGATGGCGCAGGG..... 1 macaque_lib5
mm1 ....GTAGAGGAGATGGCGCAGGGAC..... 1 macaque_lib5
mm1 ....GTAGAGGAGATGGCGCAGGG..... 1 macaque_lib5
mm1 ....GTAGAGGAGATGGCGCAGG..... 1 macaque_lib5
mm1 ....GTAGAGGAGATGGCGCAGGG..... 3 macaque_lib6
mm1 ....GTAGAGGAGATGGCGCAGGG..... 3 macaque_lib6
mm1 ....AGGAGATGGCGCAGGGAC..... 1 macaque_lib6
mm1 ....GTAGAGGAGATGGCGCAGG..... 1 macaque_lib6
mm1 ....GTAGAGGAGATGGCGCAGGGAC..... 4 macaque_lib10
mm1 ....GTAGAGGAGATGGCGCAGGGAC..... 3 macaque_lib8
mm1 ....GTAGAGGAGATGGCGCAGGGAC..... 2 macaque_lib8
mm1 ....GTAGAGGAGATGGCGCAGGG..... 2 macaque_lib8
mmu ...(((((((.(.(.(.((((((((((.(.....((((((((((.....)))))))))).))))))))))....
mmu AAGAGGTAGAGGAGATGGCGCAGGGACACAGGTAGGCTTGGGGTCTGTGG-ACCTTGGACATGTCTCTCTCCCTCCCTCCAGGTGTA
mmu >>>>+++++
mmu ....GTAGAGGAGATGGCGCAGGG..... 3 mouse_lib1
hsa chromosome:6:30660083:30660178:1 ENST00000376575 ENSG00000204580 DDR1 Epithelial discoidin domain-containing receptor 1 precursor (EC 2.7.10.1) (Epithelial discoidin domain receptor 1) (Tyrosine kinase DDR) (Discoidin receptor tyrosine kinase) (Tyrosine-protein kinase CAK) (Cell adhesion kinase) (TRK E) (Protein-tyrosine ki [Source:UniProt/SWISSPROT;Acc:Q08345]
ptr chromosome:6:31202460:31202555:1 ENSPTR00000033105 ENSPTRG00000017930 ABCF1 ATP-binding cassette sub-family F member 1 (ATP-binding cassette 50) (TNF-alpha-stimulated ABC protein) [Source:UniProt/SWISSPROT;Acc:Q9N871]
mm1 chromosome:4:30166017:30166112:1 ENSMMU00000002661 ENSMUG00000001886 Q5TM60 MACMU ATP-binding cassette, sub-family F (GCN20), member 1. [Source:UniProt/SPTREMBL;Acc:Q5TM60]
mmu chromosome:17:35568778:35568872:-1 ENSMUST000000087205 ENSMUG000000038762 Abcf1 ATP-binding cassette, sub-family F (GCN20), member 1 [Source:MarkerSymbol;Acc:MGI:1351658]

```





























Figure S7. Correlation between Number of Mirtron Small RNA Reads and Number of Human ESTs.

| mirtron           | host gene       | host transcript | location                            | total reads | ESTs in the region | ESTs in the entire gene |
|-------------------|-----------------|-----------------|-------------------------------------|-------------|--------------------|-------------------------|
| hsa-mir-877       | ENSG00000204580 | ENST00000376575 | chromosome:6:30660083:30660178:1    | 59          | 55                 | 13804                   |
| hsa-mir-1224      | ENSG00000145198 | ENST00000273794 | chromosome:3:185441882:185441976:1  | 58          | 9                  | 45                      |
| hsa-mir-1225      | ENSG00000008710 | ENST00000382481 | chromosome:16:2080192:2080291:1     | 3           | 45                 | 742                     |
| hsa-mir-1226      | ENSG00000132153 | ENST00000348968 | chromosome:3:47866044:47866128:1    | 143         | 92                 | 568                     |
| hsa-mir-1227      | ENSG00000104886 | ENST00000326631 | chromosome:19:2185056:2185153:1     | 5           | 111                | 263                     |
| hsa-mir-1228      | ENSG00000123384 | ENST00000338962 | chromosome:12:55874549:55874631:1   | 6           | 7                  | 951                     |
| hsa-mir-1229      | ENSG00000161013 | ENST00000376937 | chromosome:5:179157879:179157957:1  | 16          | 298                | 1287                    |
| hsa-mir-1231      | ENSG00000134369 | ENST00000367302 | chromosome:1:200044357:200044458:1  | 3           | 15                 | 618                     |
| hsa-mir-1233      | ENSG00000175676 | ENST00000328919 | chromosome:15:20996204:20996295:1   | 3           | 55                 | 128                     |
| hsa-mir-1234      | ENSG00000071894 | ENST00000349769 | chromosome:8:145596279:145596372:1  | 3           | 35                 | 482                     |
| hsa-mir-1236      | ENSG00000204356 | ENST00000375429 | chromosome:6:32032590:32032701:1    | 2           | 165                | 316                     |
| hsa-mir-1237      | ENSG00000162302 | ENST00000334205 | chromosome:11:63892645:63892756:1   | 2           | 23                 | 206                     |
| hsa-mir-1238      | ENSG00000130734 | ENST00000309469 | chromosome:19:10523793:10523885:1   | 2           | 38                 | 222                     |
| human_block172399 | ENSG00000107331 | ENST00000371605 | chromosome:9:139030140:139030239:1  | 3           | 24                 | 493                     |
| human_block107544 | ENSG00000088247 | ENST00000201886 | chromosome:19:6366308:6366395:1     | 2           | 71                 | 602                     |
| human_block96092  | ENSG00000141258 | ENST00000268989 | chromosome:17:2222294:2222391:1     | 2           | 11                 | 389                     |
| human_block168305 | ENSG00000179950 | ENST00000349157 | chromosome:8:144971936:144972024:1  | 1           | 202                | 861                     |
| human_block108536 | ENSG00000105655 | ENST00000338128 | chromosome:19:18408053:18408144:1   | 1           | 83                 | 595                     |
| human_block2497   | ENSG00000121753 | ENST00000373658 | chromosome:1:31974574:31974765:1    | 1           | 18                 | 175                     |
| human_block145951 | ENSG00000078269 | ENST00000367122 | chromosome:6:158405766:158405850:1  | 1           | 6                  | 300                     |
| human_block100511 | ENSG00000108840 | ENST00000336057 | chromosome:17:39511555:39511693:1   | 1           | 109                | 366                     |
| human_block168304 | ENSG00000179950 | ENST00000349157 | chromosome:8:144970973:144971072:1  | 1           | 142                | 861                     |
| human_block127094 | ENSG00000198355 | ENST00000360612 | chromosome:22:48742513:48742596:1   | 1           | 70                 | 346                     |
| human_block94727  | ENSG00000102904 | ENST00000388833 | chromosome:16:66417476:66417560:1   | 1           | 7                  | 56                      |
| human_block88730  | ENSG00000184916 | ENST00000347004 | chromosome:14:104688155:104688251:1 | 1           | 5                  | 95                      |
| human_block713    | ENSG00000171608 | ENST00000377346 | chromosome:1:9703302:9703391:1      | 1           | 11                 | 229                     |
| human_block168233 | ENSG00000104518 | ENST00000262580 | chromosome:8:144715659:144715765:1  | 1           | 75                 | 429                     |
| human_block110912 | ENSG00000130726 | ENST00000341753 | chromosome:19:63753459:63753560:1   | 1           | 359                | 1532                    |
| human_block29395  | ENSG00000173442 | ENST00000309295 | chromosome:11:65148409:65148522:1   | 1           | 25                 | 1146                    |
| human_block110710 | ENSG00000125503 | ENST00000376393 | chromosome:19:60295720:60295806:1   | 1           | 33                 | 284                     |
| human_block185010 | ENSG00000198753 | ENST00000361971 | chromosome:X:152693451:152693533:1  | 1           | 16                 | 117                     |
| human_block109083 | ENSG00000089351 | ENST00000318014 | chromosome:19:40192935:40193032:1   | 1           | 64                 | 379                     |
| human_block91836  | ENSG00000008710 | ENST00000382481 | chromosome:16:2083736:2083817:1     | 1           | 18                 | 742                     |
| human_block152130 | ENSG00000197150 | ENST00000377904 | chromosome:7:150378969:150379063:1  | 1           | 5                  | 492                     |
| human_block91683  | ENSG00000185615 | ENST00000219406 | chromosome:16:275012:275089:1       | 1           | 17                 | 59                      |

**Fig. S8. Minimum Free Energies (MFEs) of 5 nt Terminal Duplexes of Mirtronic miRNAs.**

```
-----
>hsa-mir-877
GUAGAGGAGAUGGGCGAGGGGACACGGGCAAAGACUUGGGGUUCCUGGACCUCACAGCUGUGUCCUCUUCUCCUCCUCCAG
...(((((((...((...(((.....(((.....)))))))).).)))))).... (-39.50)
>left
GUAGA&UCCAG
...((&)).... ( 1.20)
>right
GGGAC&GUCCU
((((&))) ( -5.40)
```

**Dominant arm: 5'**  
**Cloning: consistent**

```
-----
>hsa-mir-1224
GUGAGGACUCGGGAGGUGGAGGGUGGCCGCCGGGGCGGCGUUCUUCAGCUCGCUUCUCCCCCACCUCUCUCUCCUCAG
.(((((((...(((.....(((.....)))))))).).)))))).... (-45.00)
>left
GUGAG&CUCAG
.((((&))). ( -3.00)
>right
GAGGG&CCCCC
(.((&)).) ( -2.20)
```

**Dominant arm: 3'**  
**Difference between arms is small.**  
**Cloning: 3' arm is more abundant in chimp,**  
**in human and macaque - 5' arm is slightly more abundant.**

```
-----
>hsa-mir-1225
GUGGGUACGGCCAGUGGGGGGAGAGGGACAGCCUGGGCUCUGCCAGGGUGCAGCCGGACUGACUGAGCCCCUGGCCGCCCCAG
.(((((((...(((.....(((.....)))))))).).)))))).... (-48.20)
>left
GUGGG&CCCAG
.((((&))). ( -5.10)
>right1
GGGG&ACUGAGCC
((((&...)) ( 0.60)
>right2
GG&UGAGC
((&...)) ( 8.30)
```

**Dominant arm: 3'**  
**Cloning: more 5' reads but difference in clone numbers is small**

```
-----
>hsa-mir-1226
GUGAGGGCAUGCAGGCCUGGAUGGGGACGUGGGAUGGUCCAAAAGGGUGGCCUCACCAGCCUUGUUCUCCUAG
...(((((((...(((.....(((.....)))))))).).)))))).... (-36.90)
>left
GUGAG&CUAG
...((&)).. ( 1.40)
>right1
UGGG&CCUCA
((((&))) ( -4.40)
>right2
GGAUGG&UCACC
(.((&))) ( -0.70)
```

**Dominant arm: 5'**  
**Cloning: inconsistent, mostly 3' reads**



```
>hsa-mir-1227
GUGGGGCCAGGCGGUGGUGGGGCACUGCUGGGGUGGGGCACAGCAGCCAUGCAGAGCGGGCAUUUGACCCCGUGCCACCCUUUUCCCCAG
.(((((((((...((((((((((((((...((((((...))))))...))))))...))))))...))))). (-36.70)
>left
GUGGG&CCCAG
.((((&))))). (-5.10)
>right1
GGUGG&CCCGUGCC
(((((&)...))) (-1.30)
>right2
GU&CGUGC
((&...)) ( 1.90)
```

**Dominant arm: 3'**  
**Cloning: consistent**

-----

```
>hsa-mir-1228
GUGGGCGGGGGCAGGUGUGUGGUGGGUGGUGGCCUGCGGUGAGCAGGGCCUCACACCUGCCUGCCCCCAG
..(((((((...((((((((((((((...((((((...))))))...))))))...))))))...))))). (-46.00)
>left
GUGGG&CCCCCAG
..((((&)))....) (-3.30)
>right1
GUGUG&CAC
((..&)) (-0.80)
>right2
UGUGU&UCACA
((((&.))) (-2.50)
```

**Dominant arm: 3'**  
**Cloning: consistent**

-----

```
>mml-mir-1230
GUGGGUGGGGGCAUCUCGAGGAGGUGGGGGGUGUGGCGCCAGCGGAUGACUCCGAGCGGCUCUUUCCCCAG
.(((((((...((((((((((((((...((((((...))))))...))))))...))))))...))))). (-38.40)
>left
GUGGG&CCCAG
.((((&))))). (-5.10)
>right
CGGAG&CUCCG
(((((&)))) (-6.10)
```

**Dominant arm: 5'**  
**Cloning: consistent**

-----

Figure S9. MiRbase 10.0 Drosophila, human and mouse mature miRNAs annotated with a 5' G nucleotide.

|                 |                          |                 |                          |                 |                        |               |                      |
|-----------------|--------------------------|-----------------|--------------------------|-----------------|------------------------|---------------|----------------------|
| dme-miR-1017    | GAAGCTCTACCCAAACTCATCC   |                 |                          |                 |                        |               |                      |
| dme-miR-263a    | GTTAATGGCACTGGAAGAATTCAC |                 |                          |                 |                        |               |                      |
| dme-miR-306*    | GGGGTCACTCTGTGCCTGTGC    |                 |                          |                 |                        |               |                      |
| dme-miR-309     | GCACCTGGGTAAGTTTCTCCTA   |                 |                          |                 |                        |               |                      |
| hsa-miR-138-2*  | GCTATTCTGACACACAGGAGTT   | hsa-miR-138-1*  | GCTACTTCAACAACCAGGGGCC   |                 |                        |               |                      |
| hsa-miR-139-3p  | GCAGACGGCCCTCTTGAAGT     |                 |                          |                 |                        |               |                      |
| hsa-miR-143*    | GGTGCAGTCTGCATCTCTGGT    |                 |                          |                 |                        |               |                      |
| hsa-miR-144*    | GGATATCATATACATGTAAG     |                 |                          |                 |                        |               |                      |
| hsa-miR-145     | GTCCAGTTTTCCAGGAATCCCT   | hsa-miR-145*    | GGATTCCTGGAAACTACTGTTCT  | mmu-miR-145     | GTCCAGTTTTCCAGGAATCCCT |               |                      |
| hsa-miR-147b    | GTGTGCGGAAATGCTCTGCCTA   | hsa-miR-147     | GTGTGTGGAAATGCTCTGCG     | mmu-miR-147     | GTGTGCGGAAATGCTCTGCCTA |               |                      |
| hsa-miR-183*    | GTGAATTACCGAAGGCCATAA    | mmu-miR-183*    | GTGAATTACCGAAGGCCATAA    |                 |                        |               |                      |
| hsa-miR-186*    | GCCTCAAGGTGAATTTTTGGG    | mmu-miR-186*    | GCCTCAAGGTGAATTTTTGGG    |                 |                        |               |                      |
| hsa-miR-187*    | GGCTACAACACAGGACCCGGGC   |                 |                          |                 |                        |               |                      |
| hsa-miR-191*    | GCTGCGCTTGGATTTCTGCC     | mmu-miR-191*    | GCTGCACTTGGATTTCTGCC     |                 |                        |               |                      |
| hsa-miR-198     | GGTCCAGAGGGGAGATAGTTTC   |                 |                          |                 |                        |               |                      |
| hsa-miR-203     | GTGAATGTTTAGACCACTAG     | mmu-miR-203     | GTGAATGTTTAGACCACTAG     |                 |                        |               |                      |
| hsa-miR-23a*    | GGGGTCTCTGGGATGGGATTT    |                 |                          |                 |                        |               |                      |
| hsa-miR-296-3p  | GAGGGTTGGGTGAGGCCTCTCC   | mmu-miR-296-3p  | GAGGGTTGGGTGAGGCCTCTCC   |                 |                        |               |                      |
| hsa-miR-296-1*  | GCTGGTTTCATATGGTGTTAGA   | mmu-miR-296*    | GCTGGTTTCATATGGTGTTAGA   |                 |                        |               |                      |
| hsa-miR-330-3p  | GCAAAAGCACAGGCGCTGCAGAGA | mmu-miR-330*    | GCAAAAGCACAGGCGCTGCAGAGA |                 |                        |               |                      |
| hsa-miR-331-3p  | GCCCTGGGCGCTATCTAGAA     | mmu-miR-331-3p  | GCCCTGGGCGCTATCTAGAA     |                 |                        |               |                      |
| hsa-miR-337-5p  | GAAGCGCTTCATACAGGAGTT    | mmu-miR-337-5p  | GAAGCGCTTCATACAGGAGTT    |                 |                        |               |                      |
| hsa-miR-33b     | GTGCATTGCTGTTGCATTGC     | hsa-miR-33a     | GTGCATTGCTGTTGCATTGCA    | mmu-miR-33      | GTGCATTGCTGTTGCATTGCA  |               |                      |
| hsa-miR-345     | GCTGACTCTAGTCCAGGGCTC    | mmu-miR-345-5p  | GCTGACTCTAGTCCAGGGCTC    |                 |                        |               |                      |
| hsa-miR-370     | GCCTGCTGGGTGGAACCTGGT    | mmu-miR-370     | GCCTGCTGGGTGGAACCTGGT    |                 |                        |               |                      |
| hsa-miR-373     | GAAGTGCCTCGATTTGGGGGT    |                 |                          |                 |                        |               |                      |
| hsa-miR-376a*   | GTAGATTCTCTCTATGAGTA     | mmu-miR-376b*   | GTGGATATCTCTATGTTTA      | mmu-miR-376e*   | GTGGATATCTCTCTATGTTTA  | mmu-miR-376a* | GGTAGATTCTCTCTATGAGT |
| hsa-miR-382     | GAAGTGTTCGTGGTGGATTCG    | mmu-miR-382     | GAAGTGTTCGTGGTGGATTCG    |                 |                        |               |                      |
| hsa-miR-409-3p  | GAAGTGTTCGTGGTGGATTCG    | mmu-miR-409-3p  | GAAGTGTTCGTGGTGGATTCG    |                 |                        |               |                      |
| hsa-miR-455-3p  | GCAGTCCATGGCGATATACAC    | mmu-miR-455     | GCAGTCCACGGGCATATACAC    |                 |                        |               |                      |
| hsa-miR-485-3p  | GTACATACAGGCTCTCTCTCT    |                 |                          |                 |                        |               |                      |
| hsa-miR-489     | GTGACATCACATACAGGCGAGC   |                 |                          |                 |                        |               |                      |
| hsa-miR-505*    | GGGAGCCAGGAAGTATGATGT    |                 |                          |                 |                        |               |                      |
| hsa-miR-511     | GTGCTTTTGTCTGCACTCA      |                 |                          |                 |                        |               |                      |
| hsa-miR-515-3p  | GAGTGCCTCTTTGGAGCGTT     |                 |                          |                 |                        |               |                      |
| hsa-miR-518f    | GAAGCGCTTCTCTTAGAGG      | hsa-miR-518a-3p | GAAGCGCTTCTCTTAGAGG      |                 |                        |               |                      |
| hsa-miR-523     | GAACGCGCTTCCCTATAGAGGT   |                 |                          |                 |                        |               |                      |
| hsa-miR-524-3p  | GAAGCGCTTCCCTTAGAGG      |                 |                          |                 |                        |               |                      |
| hsa-miR-525-3p  | GAAGCGCTTCCCTTAGAGG      |                 |                          |                 |                        |               |                      |
| hsa-miR-528b*   | GAAGTGTTCCTTTAGAGGC      |                 |                          |                 |                        |               |                      |
| hsa-miR-539     | GGAGAAATATCCTGTGGTGT     | mmu-miR-539     | GGAGAAATATCCTGTGGTGT     |                 |                        |               |                      |
| hsa-miR-551a    | GCAGCCACTCTGGTTTCCA      | hsa-miR-551b    | GCAGCCACTCTGGTTTCCAG     | hsa-miR-551b*   | GAATCAAGCGTGGGTGAGACC  | mmu-miR-551b  | GCGACCATACTGGTTTCCAG |
| hsa-miR-554     | GCTAGTCTGACTCCAGCATG     |                 |                          |                 |                        |               |                      |
| hsa-miR-556-5p  | GATGAGCTATGTAATATGAG     |                 |                          |                 |                        |               |                      |
| hsa-miR-557     | GTTTGACAGGTTGGGCTTGTCT   |                 |                          |                 |                        |               |                      |
| hsa-miR-560     | GCCTGCGCGCGCGCGCGCC      |                 |                          |                 |                        |               |                      |
| hsa-miR-565     | GGCTGCGCTCGGATGCTGTTT    |                 |                          |                 |                        |               |                      |
| hsa-miR-566     | GGCGCCTGTGATCCAC         |                 |                          |                 |                        |               |                      |
| hsa-miR-572     | GTCCGCTCGCGGTGGCCCA      |                 |                          |                 |                        |               |                      |
| hsa-miR-575     | GAGCCAGTTGGACAGGAGC      |                 |                          |                 |                        |               |                      |
| hsa-miR-590-5p  | GAGCTTATCATAAAGTGACG     | mmu-miR-590-5p  | GAGCTTATCATAAAGTGACG     |                 |                        |               |                      |
| hsa-miR-595     | GAAGTGTCCGCTGGTGTGCT     |                 |                          |                 |                        |               |                      |
| hsa-miR-599     | GTGTGTGCTTATCAAC         |                 |                          |                 |                        |               |                      |
| hsa-miR-602     | GACACGGGCGACAGCTCGGCC    |                 |                          |                 |                        |               |                      |
| hsa-miR-607     | GTCAAAATCCAGATCTATAAC    |                 |                          |                 |                        |               |                      |
| hsa-miR-611     | GCAGGACCCCTCGGCTCTGAC    |                 |                          |                 |                        |               |                      |
| hsa-miR-612     | GCTGGGACGGCTCTGAGCTCCTT  |                 |                          |                 |                        |               |                      |
| hsa-miR-614     | GAACCGCTGTTCTTCCAGGTTGG  |                 |                          |                 |                        |               |                      |
| hsa-miR-615-5p  | GGGGGTCCCCGGTCTCGGATC    | mmu-miR-615-5p  | GGGGGTCCCCGGTCTCGGATC    |                 |                        |               |                      |
| hsa-miR-619     | GACCTGGACATGTTTGCCCGAGT  |                 |                          |                 |                        |               |                      |
| hsa-miR-621     | GGCTAGCAACAGCGCTTACCT    |                 |                          |                 |                        |               |                      |
| hsa-miR-625*    | GACTATGAACTTTCCCGCTCA    |                 |                          |                 |                        |               |                      |
| hsa-miR-627     | GTGAGTCTTAAGAAAGAGGGA    |                 |                          |                 |                        |               |                      |
| hsa-miR-629*    | GTTCTCCAGATTAACCCAGC     |                 |                          |                 |                        |               |                      |
| hsa-miR-632     | GTGTCTGCTCTCTGGGA        |                 |                          |                 |                        |               |                      |
| hsa-miR-642     | GTCCCTCTCAAATGTTCTTG     |                 |                          |                 |                        |               |                      |
| hsa-miR-647     | GTGGCTGCACTCACTTCTTC     |                 |                          |                 |                        |               |                      |
| hsa-miR-653     | GTGTTGAAACAATCTCACTG     | mmu-miR-653     | GTGTTGAAACAATCTCACTG     |                 |                        |               |                      |
| hsa-miR-657     | GGCAGGTTCTCAACCTCTTAGG   |                 |                          |                 |                        |               |                      |
| hsa-miR-658     | GGCGGAGGGAAGTAGTCCGTTGGT |                 |                          |                 |                        |               |                      |
| hsa-miR-674     | GCACCTGAGATGGGAGTGGTGA   | mmu-miR-674     | GCACCTGAGATGGGAGTGGTGA   |                 |                        |               |                      |
| hsa-miR-768-5p  | GTGTGGAGTGAAGTATGATGAT   |                 |                          |                 |                        |               |                      |
| hsa-miR-801     | GATTGCTCTGCTGCGGAATCGAC  | mmu-miR-801     | GATTGCTGCTGCGGAATCGAC    |                 |                        |               |                      |
| hsa-miR-873     | GCAGGAACCTGTGAGTCTCCT    | mmu-miR-873     | GCAGGAACCTGTGAGTCTCCT    |                 |                        |               |                      |
| hsa-miR-877     | GTAGAGGATGGCCAGAGG       | mmu-miR-877     | GTAGAGGATGGCCAGAGG       |                 |                        |               |                      |
| hsa-miR-887     | GTGAACGGGCGCCATCCCGAGG   |                 |                          |                 |                        |               |                      |
| hsa-miR-888*    | GACTGACACCTCTTTGGTGAA    |                 |                          |                 |                        |               |                      |
| hsa-miR-920     | GGGAGCTGTGGAAGCAGTA      |                 |                          |                 |                        |               |                      |
| hsa-miR-922     | GCAGCAGAGAAATAGACTACGTC  |                 |                          |                 |                        |               |                      |
| hsa-miR-923     | GTCAAGCGAGGAAAAGAACT     |                 |                          |                 |                        |               |                      |
| hsa-miR-929-2*  | GGTGGGATTTGTTGCATTAC     |                 |                          |                 |                        |               |                      |
| mmu-miR-133a*   | GCTGGTAAATGGAACCAAT      |                 |                          |                 |                        |               |                      |
| mmu-miR-146b*   | GCCCTAGGACTAGTCTGGT      |                 |                          |                 |                        |               |                      |
| mmu-miR-207     | GCTTCTCTGCTCTCTCCCTC     |                 |                          |                 |                        |               |                      |
| mmu-miR-24-2*   | GTGCCACTGAGCTGAAACAGT    | mmu-miR-24-1*   | GTGCCACTGAGCTGATATCAGT   |                 |                        |               |                      |
| mmu-miR-291b-5p | GATCAAAGTGGAGGCCCTCTCC   |                 |                          |                 |                        |               |                      |
| mmu-miR-298     | GGCAGAGGAGGGCTGTTCTTCCC  |                 |                          |                 |                        |               |                      |
| mmu-miR-302c*   | GCTTTAAGATGGGTACCTGCG    |                 |                          |                 |                        |               |                      |
| mmu-miR-374*    | GSTTGATATGATGTTCCGAG     |                 |                          |                 |                        |               |                      |
| mmu-miR-434-5p  | GCTGAGCTATGGTTGAACCA     |                 |                          |                 |                        |               |                      |
| mmu-miR-465a-3p | GATCAGGCGCTTCTAAGTAGA    |                 |                          |                 |                        |               |                      |
| mmu-miR-466b-5p | GATGTGTGTACATGTACATG     | mmu-miR-466e-5p | GATGTGTGTGTACATGTACATA   | mmu-miR-466e-5p | GATGTGTGTGTACATGTACATA |               |                      |
| mmu-miR-467b    | GTAAGTGCCTGCATATATG      |                 |                          |                 |                        |               |                      |
| mmu-miR-503*    | GAGTATTGTTCCACTGCCTGG    |                 |                          |                 |                        |               |                      |
| mmu-miR-666-3p  | GGCTGACGCTGATCGCTGCT     |                 |                          |                 |                        |               |                      |
| mmu-miR-678     | GTCTGCTGCAAGGACTGAGG     |                 |                          |                 |                        |               |                      |
| mmu-miR-679     | GCAGCTGTGAGTACTCTTCTG    |                 |                          |                 |                        |               |                      |
| mmu-miR-680     | GGCATCTGCTGACATGGGG      |                 |                          |                 |                        |               |                      |
| mmu-miR-693-3p  | GCAGCTTTCAGATGGCTGTA     |                 |                          |                 |                        |               |                      |
| mmu-miR-696     | GCTGTGCTTGTCTGGG         |                 |                          |                 |                        |               |                      |
| mmu-miR-705     | GGTGGGAGTGGGGGGGCA       |                 |                          |                 |                        |               |                      |
| mmu-miR-709     | GGAGGCAGAGGCAGAGGA       |                 |                          |                 |                        |               |                      |
| mmu-miR-711     | GGGACCGGGGAGAGTAAAG      |                 |                          |                 |                        |               |                      |
| mmu-miR-742     | GAAAGCCACATGCTGGGTAAA    |                 |                          |                 |                        |               |                      |
| mmu-miR-743a    | GAAAGACACCAAGCTGAGTAGA   | mmu-miR-743b-3p | GAAAGACATCATGCTGAATAGA   |                 |                        |               |                      |
| mmu-miR-759     | GCAGAGTGAACAATTTGAC      |                 |                          |                 |                        |               |                      |
| mmu-miR-761     | GCAGCAGGTTGAACTGACACA    |                 |                          |                 |                        |               |                      |
| mmu-miR-762     | GGGGTGGGGCCGGACAGAGC     |                 |                          |                 |                        |               |                      |
| mmu-miR-764-5p  | GGTGCCTACATGCTCTCT       |                 |                          |                 |                        |               |                      |
| mmu-miR-805     | GAATGATCAGGACATAGGG      |                 |                          |                 |                        |               |                      |
| mmu-miR-878-3p  | GCATGACACCACACTGGGTAGA   |                 |                          |                 |                        |               |                      |
| mmu-miR-879*    | GCTTATGGCTTCAAGCTTTCGG   |                 |                          |                 |                        |               |                      |
